# Supplementary material
Source: PubMed Central journal article supplement (PMC2746502)
Supplement: NIHMS120646-supplement-01.pdf [file NIHMS120646-supplement-01.pdf]

## SUPPLEMENTARY MATERIAL

### Supplementary Materials and Methods

*Assessment of viral infection*-To determine purity of the monocyte preparations and progeny virion production,  $1 \times 10^6$  cells were stained with APC-conjugated anti-CD14 mAb in 5 % BSA, 0.1% sodium azide in 1X PBS for 30 min at room temperature. Cells were washed with 1X PBS by three subsequent centrifugations at  $500 \times g$  for 2 min and fixed in the dark with 4% PFA pH 7.4 for 15 min at room temperature (RT). Cells were washed and permeabilized with 1% Triton X-100 in 1X PBS. Incubation was with FITC-conjugated IgG2a mouse anti-HIV-1 p24 followed for 45 min at RT. Data acquisition was performed on FACSCalibur flow cytometer (Becton Dickinson) using CellQuest software (Becton Dickinson). Live cells were gated by forward and side scatter using FCS Express V3 software (De Novo Software, Los Angeles, CA). Data are shown as density plots of HIV-treated and control monocytes at day 7 after viral exposure. RT activity was determined in culture supernatant fluids as previously described [76].

*Quantification of HIV-1 cDNA and 2-LTR circles*- Monocytes ( $10 \times 10^6$  cells) 7 d after exposure to HIV-1<sub>ADA</sub> were counted by trypan blue exclusion, washed with PBS and pelleted by centrifugation at  $800 \times g$  for 5 min. Total DNA was isolated by DNAzol<sup>®</sup> Genomic DNA Isolation Reagent (MP Biomedicals, Inc. Solon, OH) according to manufacturer's instructions and was analyzed by Real-Time PCR. The TaqMan method with primers and probes specific for late reverse transcripts and 2-LTR circle forms was performed. Products were amplified from 10 (late) or 20 (2-LTR)  $\mu$ l of DNA in 50  $\mu$ l reactions containing 2X TaqMan Universal PCR Master Mix, 300 nM primers and 100 nM probe. Late products were amplified with primers: For LATE (5'-TGTGTGCCCGTCTGTTGTGT-3'), REV-LATE (5'-GAGTCCTGCGTCGAGA GAGC-3') and the probe (5'-/56-FAM/CAGTGGCGCC CGAACAGG GA/36-TAMTph/-3'); 2-LTR circle products: 2-LTR-FOR (5'-TAGACCA GATCTGAGCCTGGGA-3'), 2-LTR-REV (5'-GTAGTTCTGCCAA TCAGGGAGG-3') and the probe (5'-56-/FAM/AG CCTCAATAAAGCTTGCCCTTGAGTGC/36-TAMSp/-3'). Thermal Cycling Conditions were maintained as follows: incubation at 50°C -2 min; at 95°C -10 min; 45 cycles of 95°C - 15 s, 60°C -1 min; 72°C -20

s; assay reading; incubation at 72°C -5 min; assay reading; incubation at 4°C. DyNAmo SYBR Green qPCR Kit (New England Biolabs, Ipswich, MA) was used with primers for specific detection of early reverse transcripts. Products were amplified from 8 µl of DNA in 50 µl reaction containing 2X Master Mix and 0.3 µM primers M667 (5'-GGCTAACTAGGGAACCCACTG-3') and AA55 (5'-CTGCTAGAGATTTTCCACACTGA C-3') specific for the negative-strand "strong-stop" DNA. Thermal Cycling conditions were: 50°C for 2 min; 95°C for 10 min; 45 cycles of 94°C -12 s, 62°C -25 s, 72°C - 25 s; assay reading; incubate at 72°C for 5 min; assay reading; melting curve: temperature 65-95°C, reading every 0.5°C, hold 0.1 s, 72°C - 5 min, incubation at 4°C. Real-time PCR was performed in triplicate and fluorescence was measured on CFD 3200 Opticon System (Bio-Rad, Hercules, CA). Serial dilutions of DNA from 8E5 cells were used as the quantitative standards.

### **Supplementary Figure Legends**

**Figure S1. Oxidative stress and viability in latently infected cells. (A) Increased hROS in HIV-1-exposed monocytes.** Levels of hROS in HIV-1-treated and non treated monocytes at day 7 after exposure were measured after 30 min of incubation with APF. Fluorescence levels were acquired on a plate reader and tabulated as MFI units. Data show significantly augmented levels of hROS in latently infected monocytes ( $P = 0.008$ ; error bars=  $\pm$  SEM;  $n=3$ ). **(B) PMA-induced hROS production.** Concentration of PMA inducing similar levels of hROS to those found in HIV-1-treated cells was determined by performing dose response experiments in non-treated monocytes. Fluorescence readings of APF activation were used as a read out method. Incubation of  $1 \times 10^6$  cells for 1 h with 10 ng/ml of PMA induced similar hROS levels as their latently infected counterparts. **(C) HIV-1-treated and non-treated and (D) PMA-exposed (1 h) monocytes** were stained with PI (top panels) and PI and Annexin V (bottom panels), and analyzed by flow cytometry. Analysis shows exposure to HIV-1 does not affect cell viability ( $M1 < 2\%$  for HIV-exposed monocytes compared to controls), similar levels of hROS in PMA-induced cells generate very similar cell death activity (5% of all cells).

**Figure S1**

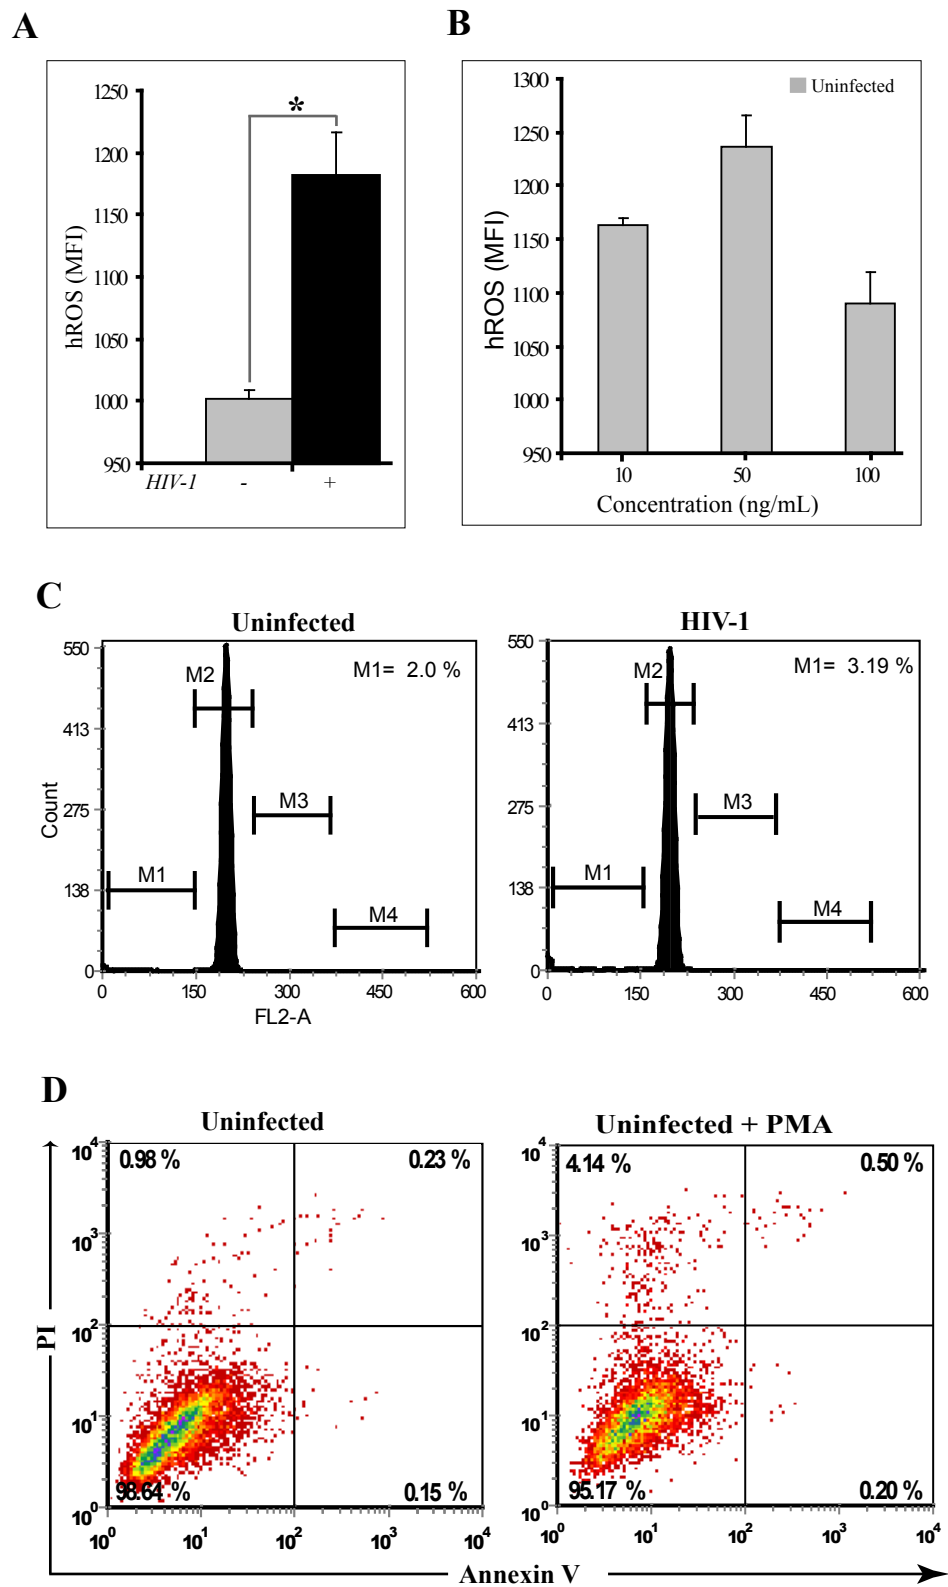

**Table S1. PM differentially expressed proteins**

| Reference <sup>a</sup>                                             | DIGE Index <sup>b</sup> | Pept. # <sup>c</sup> | MW <sup>d</sup> | SwissProt <sup>e</sup> | Location <sup>f</sup> |
|--------------------------------------------------------------------|-------------------------|----------------------|-----------------|------------------------|-----------------------|
| Inward rectifier potassium channel 13                              | -2.62                   | 2                    | 3271            | O60928                 | PMi (multipass)       |
| Calcium-independent alpha-latrotoxin receptor 1 (GPCR)             | -2.37                   | 3                    | 162717          | O94910                 | PMi (multipass)       |
| Probable N-acetyltransferase 8                                     | -2.92                   | 3                    | 25596           | Q9UHE5                 | PMi (multipass)       |
| MHC class II HLA-DR-beta cell surface glycoprotein (fragment)      | -2.0                    | 2                    | 7921            | Q29830                 | PMi (multipass)       |
| Integrin alpha v (CD51)                                            | -2.67                   | 2                    | 6739            | P06756                 | PMi (singlepass TI)   |
| HLA class II histocompatibility antigen, DX beta chain [Precursor] | -4.18                   | 3                    | 10551           | P05538                 | PMi (singlepass TI)   |
| IgG Fc gamma receptor IIA (CD32)                                   | 2.0                     | 2                    | 1085            | P12318                 | PMi (singlepass TI)   |
| Leukocyte immunoglobulin-like receptor 6 (CD85i)                   | -2.0                    | 2                    | 55096           | O75019                 | PMi (singlepass TI)   |
| Pro-neuregulin-1, membrane-bound isoform [Precursor]               | -3.81                   | 7                    | 36974           | Q02297                 | PMi (singlepass TI)   |
| Tumor necrosis factor ligand (CD40)                                | -2.0                    | 2                    | 25644           | P01375                 | PMi (singlepass TII)  |
| Glutamate receptor C [Fragment]                                    | -4.18                   | 2                    | 6814            | Q9UHA9                 | PMi                   |
| Voltage-gated potassium channel accessory subunit 5                | 1.9                     | 3                    | 14984           | Q5JWV7                 | PMi                   |
| Leucocyte antigen DRB5                                             | -2.62                   | 3                    | 10723           | Q9MY54                 | PMi                   |
| Major histocompatibility class II antigen (HLA-DRB5) (fragment)    | -2.0                    | 3                    | 10139           | Q30199                 | PMi                   |
| Leucocyte antigen (HLA-DRBI*1303)                                  | -2.0                    | 2                    | 8978            | Q29919                 | PMi                   |
| Amyloid beta A4 precursor protein-binding family B member 1        | -4.04; -2.76            | 3                    | 73183           | Q7Z5R6                 | PM                    |
| Endomembrane proton pump 58 kDa subunit                            | 2.12                    | 6                    | 56465           | BC003100               | PM                    |
| LIM and SH3 protein 1 (LASP-1)                                     | -2.69                   | 3                    | 29717           | Q14847                 | PM                    |
| Annexin I                                                          | 7.05                    | 12                   | 35040           | P04083                 | PM                    |
| Chloride intracellular channel protein 1                           | 5.67                    | 2                    | 23543           | O00299                 | PM                    |
| Vasodilator-stimulated phosphoprotein (VASP)                       | 2.75; 3.36              | 2                    | 39764           | BC026019               | PM                    |
| Band 4.1-like protein 3                                            | 4.72                    | 20                   | 123704          | Q9Y2J2                 | PM                    |
| Annexin V                                                          | 2.17; 3.96              | 6                    | 35804           | P08758                 | PM                    |
| Protein phosphatase (PP2A)                                         | -2.25                   | 19                   | 65136           | P30153                 | PM                    |
| HSP90 protein 1 beta                                               | -4.56; -4.44;           | 11                   | 83264           | Q29092                 | PM                    |
| Chaperonin containing TCP1, subunit 8                              | -2.5                    | 2                    | 59659           | Q53HU0                 | PM                    |
| TUMOR NECROSIS FACTOR TYPE 1 RECEPTOR (CD120b)                     | -2.18                   | 3                    | 66005           | P20333                 | PM                    |
| Ras GTPase activating protein (p195)                               | -3.7                    | 21                   | 189134          | A54854                 | PM                    |
| Pleckstrin homology domain containing, family A member 1           | 5.10                    | 2                    | 45553           | Q9HB21                 | PM                    |
| Prolactin receptor intermediate isoform (fragment)                 | -2.12                   | 2                    | 5269            | Q16264                 | PM                    |
| Copine-2                                                           | -3.01                   | 2                    | 61151           | AF492484               | PM                    |
| Ezrin                                                              | -4.02                   | 6                    | 69398           | P15311                 | PM                    |
| Dynamin 1-like protein isoform 1                                   | -2.0                    | 2                    | 81891           | O00429                 | PM                    |
| Shootin-1                                                          | -2.89                   | 2                    | 51473           | A0MZ66                 | PM                    |
| <b>HSP70</b>                                                       | <b>1.9</b>              | <b>6</b>             | <b>73680</b>    | <b>Q1HB43</b>          | <b>PM/S</b>           |
| Annexin A2 isoform 2                                               | 5.12                    | 8                    | 38604           | P07355                 | PM/S                  |

**Table S1. PM differentially expressed proteins (continued)**

| Reference <sup>a</sup>                         | DIGE Index <sup>b</sup> | Pept. # <sup>c</sup> | MW <sup>d</sup> | SwissProt <sup>e</sup> | Location <sup>f</sup> |
|------------------------------------------------|-------------------------|----------------------|-----------------|------------------------|-----------------------|
| Calreticulin precursor                         | -2.48                   | 8                    | 48141           | P27797                 | PM/S                  |
| LPS-associated protein 1                       | -2.0                    | 5                    | 53517           | A4D110                 | PM/S                  |
| Enolase 1                                      | -6.35; -3.55 ;          | 2                    | 47169           | P06733                 | PM/S                  |
| Interleukin 16                                 | 2.0                     | 2                    | 66646           | A8MU65                 | PM/S                  |
| Protein disulfide-isomerase precursor          | 2.1                     | 20                   | 57081           | P07237                 | PM/S                  |
| Clathrin, Light peptide chain isoform B        | 2.1                     | 3                    | 25190           | Q53Y37                 | PMa                   |
| Phosphoinositide-3-kinase                      | -2.0                    | 2                    | 81624           | A0JP11                 | PMa                   |
| Neuritin-like protein precursor                | -2.0                    | 5                    | 17774           | Q496H8                 | PMa                   |
| Migration inhibitory factor-related protein 8  | -2.0                    | 2                    | 10938           | P05109                 | PMa                   |
| Calreticulin                                   | 2.0                     | 2                    | 24338           | Q9UDG2                 | PMa                   |
| Rab geranyl-geranyl transferase                | -3.44                   | 2                    | 65001           | Q6FHF7                 | PMa                   |
| Protein phosphatase 2, isoform b (PP2B)        | -2.25                   | 5                    | 73538           | Q8NHV8                 | PMa                   |
| Autophagy-related protein 16-1                 | -3.32                   | 6                    | 47656           | Q676U5                 | PMa                   |
| Disintegrin and metalloprotease domain 33      | -2.0                    | 2                    | 5266            | Q8N6B9                 | PMa                   |
| Regulator of G-protein signaling 6             | -2.0                    | 2                    | 2938            | P49758                 | PMa                   |
| Phospholipase C-gamma 1                        | -2.87                   | 2                    | 1051            | Q6LC80                 | PMa                   |
| Plastin 2                                      | -2.18; -2.15            | 18                   | 70114           | P13796                 | PMa                   |
| Coronin 1A                                     | -5.37                   | 3                    | 51026           | P31146                 | PMa                   |
| Talin 1                                        | -6.35; -2.43            | 2                    | 269764          | Q9Y490                 | PMa                   |
| Early endosome antigen                         | 3.3                     | 2                    | 162464          | Q15075                 | PMa                   |
| Transforming growth factor alpha precursor     | -2.13                   | 3                    | 9303            | Q9UQ91                 | PMa                   |
| Synphilin-1g protein                           | -3.06                   | 3                    | 6883            | Q6L980                 | PMa                   |
| Valosin-containing protein (ATP-ase)           | -3.0; 2.63              | 6                    | 89321           | Q0V924                 | PMa                   |
| Syntaxin-binding protein 1-like 2              | 3.81                    | 11                   | 72203           | Q8WVM8                 | PM/G                  |
| Mannose-6-phosphate receptor-binding protein 1 | 5.25                    | 4                    | 47018           | O60664                 | PM/G                  |
| Vacuolar ATP synthase (VATA)                   | -1.9                    | 5                    | 68165           | P31400                 | PM/L                  |
| Vacuolar proton pump subunit alpha             | -2.0                    | 18                   | 68232           | AF113129               | PM/L                  |
| Prolyl 4-hydroxylase precursor                 | -2.7                    | 12                   | 57116           | P13674                 | PM/ER                 |
| HSP90 (gp96)                                   | -4.56                   | 2                    | 79810           | P14625                 | PM/ER                 |
| Glucosidase II                                 | -6.35; -2.3             | 16                   | 106899          | Q14697                 | PM/ER                 |
| Protein disulfide isomerase-associated 4       | 2.0                     | 2                    | 72932           | P13667                 | PM/ER                 |

**Table S1. PM differentially expressed proteins (continued)**

| Reference <sup>a</sup>                                     | DIGE Index <sup>b</sup> | Pept. # <sup>c</sup> | MW <sup>d</sup> | SwissProt <sup>e</sup> | Location <sup>f</sup> |
|------------------------------------------------------------|-------------------------|----------------------|-----------------|------------------------|-----------------------|
| Voltage-dependent anion channel 1 (VDAC1)                  | 2.17                    | 7                    | 30772           | P21796                 | PM/M                  |
| Hsp60 isoform C                                            | -2.0                    | 2                    | 61587           | Q9VMN5                 | PM/M                  |
| Caldesmon-LSP1 protein                                     | 2.14                    | 11                   | 37169           | Q6FHM3                 | PM/CSK                |
| Membrane-organizing extension spike protein (moesin)       | -4.02                   | 20                   | 67820           | P26038                 | PM/CSK                |
| IQ motif containing GTPase activating protein 1            | -4.24; -3.67;           | 2                    | 189250          | A4QPB0                 | PM/CSK                |
| ELMO domain-containing protein 3                           | -2.25                   | 5                    | 43003           | Q96FG2                 | PM/CSK                |
| Fascin (Singed-like protein)                               | 5.7                     | 2                    | 54365           | Q16658                 | PM/CSK                |
| HSP 86                                                     | -4.44; -3.67            | 5                    | 35760           | P07900                 | PM/C                  |
| Phosphodiesterase 10A7 (PDE10A7)                           | 2.86                    | 2                    | 965             | Q9HCQ0                 | PM/C                  |
| Cytotoxic granule-associated RNA-binding protein p40-TIA-1 | -4.46; -3.06            | 2                    | 1256            | P31483                 | PM/C                  |
| Cyclophilin A                                              | 2.0                     | 10                   | 17881           | P62937                 | PM/C                  |
| Glyceraldehyde-3-phosphate dehydrogenase                   | 3.97                    | 3                    | 36053           | P04406                 | PM/C                  |
| Annexin VI                                                 | -3.74                   | 7                    | 75873           | P08133                 | PM/C                  |
| Plastin 1                                                  | 12.95                   | 6                    | 70278           | Q8NEG6                 | PM/C                  |
| Immunoglobulin lambda light chain variable region          | 2.1                     | 3                    | 11594           | Q96SB0                 | S                     |
| Ig heavy chain V-III region VH26                           | -3.63; -2.88            | 2                    | 12582           | P01764                 | S                     |
| <b>Cystatin B</b>                                          | <b>2.0</b>              | <b>3</b>             | <b>11140</b>    | <b>P04080</b>          | <b>S</b>              |
| Prolidase                                                  | -2.0                    | 2                    | 54582           | P12955                 | S                     |
| Vitamin D-Binding Protein                                  | -4.3                    | 2                    | 41816           | P02774                 | S                     |
| Endothelin-1 [Precursor]                                   | 2.57                    | 3                    | 24425           | P05305                 | S                     |
| Ferritin H subunit                                         | -4.18                   | 2                    | 21226           | P02794                 | S                     |
| Neurotrophic Factor Artemin                                | 2.0                     | 4                    | 23601           | Q5T4W7                 | S                     |
| Chordin                                                    | -2.87                   | 3                    | 102032          | Q9H2X0                 | S                     |
| Apolipoprotein C-II precursor                              | -2.62                   | 2                    | 11284           | P02655                 | S                     |
| Apolipoprotein C-I [Precursor]                             | -2.62                   | 2                    | 9332            | P02654                 | S                     |
| Protein NOV homolog [Precursor]                            | 2.6                     | 5                    | 39162           | P48745                 | S                     |
| Defensin, alpha 1 preproprotein                            | -3.9                    | 3                    | 10201           | Q6EZF6                 | S                     |
| Hepcidin [Precursor]                                       | -1.9                    | 4                    | 9402            | P81172                 | S                     |
| Beta-1B-glycoprotein                                       | 2.0                     | 3                    | 51676           | P02790                 | S                     |
| Complement Component C3c precursor                         | 3.4                     | 2                    | 39488           | P01024                 | S                     |
| HSP60                                                      | -2.0                    | 11                   | 61054           | P10809                 | S                     |
| <b>Leukotriene A-4 hydrolase</b>                           | <b>2.0</b>              | <b>16</b>            | <b>69110</b>    | <b>P09960</b>          | <b>S</b>              |
| L-Lactate Dehydrogenase                                    | 2.30                    | 16                   | 69285           | P00338                 | S                     |

**Table S1. PM differentially expressed proteins (continued)**

| Reference <sup>a</sup>                                                | DIGE Index <sup>b</sup> | Pept. # <sup>c</sup> | MW <sup>d</sup> | SwissProt <sup>e</sup> | Location <sup>f</sup> |
|-----------------------------------------------------------------------|-------------------------|----------------------|-----------------|------------------------|-----------------------|
| S100 calcium-binding protein A8                                       | -5.42                   | 2                    | 10938           | P05109                 | S/L                   |
| S100 calcium-binding protein A9                                       | -6.32                   | 3                    | 13242           | P06702                 | S/L                   |
| Actin, gamma                                                          | 3.42                    | 2                    | 41607           | Q9UVW9                 | S/CSK                 |
| Gelsolin precursor                                                    | -3.74                   | 6                    | 85644           | A03011                 | S/CSK                 |
| Vimentin                                                              | 3.42; 5.39;             | 82                   | 53488           | P08670                 | S/CSK                 |
| Sorting nexin-18                                                      | 2.0                     | 10                   | 68880           | Q96RF0                 | G                     |
| Coated vesicle-associated kinase                                      | -3.6                    | 2                    | 82023           | Q6P3W7                 | E                     |
| Ubiquitin-activating enzyme E1                                        | -3.0; -2.51             | 8                    | 117848          | P22314                 | E                     |
| Sorting nexin 2 (fragment)                                            | 2.25                    | 7                    | 58409           | Q53GG3                 | E                     |
| De-ubiquitinase                                                       | -3.40                   | 6                    | 95744           | P45974                 | L                     |
| Beta-N-acetylhexosaminidase                                           | 5.39                    | 8                    | 60650           | P06865                 | L                     |
| ATPase, H <sup>+</sup> transporting, lysosomal 70kDa, V1 subunit A    | -3.27                   | 18                   | 68260           | Q53YD9                 | L                     |
| ATPase, H <sup>+</sup> transporting, lysosomal 56/58kD, V1 subunit B, | 2.12                    | 3                    | 56797           | Q6P4H6                 | L                     |
| HSP 90 alpha 2                                                        | -2.25                   | 16                   | 98052           | Q5CAQ7                 | L                     |
| Cathepsin D pre-protein                                               | -2.9                    | 2                    | 44552           | P07339                 | L                     |
| Nadh- Ubiquinone Oxidoreductase Complex I                             | -6.44                   | 4                    | 11171           | O15239                 | M (membrane)          |
| Ferredoxin 1 precursor                                                | 2.0                     | 2                    | 19393           | P10109                 | M                     |
| Neurolysin                                                            | 2.0                     | 2                    | 80651           | Q9BYT8                 | M                     |
| Dihydrolipoamide dehydrogenase                                        | 5.7                     | 7                    | 54116           | A92622                 | M                     |
| Glutamate dehydrogenase                                               | 5.7                     | 4                    | 61359           | P00367                 | M                     |
| ATP synthase, H <sup>+</sup> transporting                             | 2.61                    | 2                    | 18491           | Q53FE1                 | M                     |
| Pyruvate kinase 3 isoform 1                                           | 5.48                    | 5                    | 57937           | Q15118                 | M                     |
| Pyruvate carboxylase precursor                                        | -1.9                    | 3                    | 129633          | Q16822                 | M                     |
| Isocitrate dehydrogenase 1 (NADP+)                                    | 3.42                    | 3                    | 46659           | Q567U4                 | M                     |
| Putative NF-kappa-B-activating protein 107                            | -2.0                    | 2                    | 44840           | Q8WVQ1                 | ER (membrane)         |
| Ribosome-binding protein 1                                            | 2.0                     | 20                   | 87433           | Q9P2E9                 | ER (membrane)         |

**Table S1. PM differentially expressed proteins (continued)**

| Reference <sup>a</sup>                                            | DIGE Index <sup>b</sup> | Pept. # <sup>c</sup> | MW <sup>d</sup> | SwissProt <sup>e</sup> | Location <sup>f</sup> |
|-------------------------------------------------------------------|-------------------------|----------------------|-----------------|------------------------|-----------------------|
| Fatty aldehyde dehydrogenase                                      | -1.9                    | 4                    | 54848           | P51648                 | ER (membrane)         |
| Calcium ATPase, fast twitch 1 isoform 1                           | 7.3                     | 2                    | 110252          | O14983                 | ER (membrane)         |
| Calcium ATPase, slow twitch 2 isoform 1                           | 3.7                     | 3                    | 114756          | P16615                 | ER (membrane)         |
| Microsomal glutathione S-transferase 2                            | -2.2                    | 3                    | 23356           | Q99735                 | ER (membrane)         |
| Procollagen-proline dioxygenase                                   | -3.01                   | 3                    | 60929           | P13674                 | ER                    |
| Glycosyltransferase 25                                            | -2.0                    | 2                    | 71636           | Q8IYK4                 | ER                    |
| 6-phosphogluconolactonase                                         | 2.0                     | 2                    | 27547           | O95336                 | ER                    |
| Monocyte/macrophage serine esterase                               | -4.02                   | 17                   | 62358           | Q549X7                 | ER                    |
| Transitional endoplasmic reticulum ATPase                         | -3.1                    | 20                   | 89135           | P55072                 | ER                    |
| Glutathione peroxidase 1                                          | -3.3                    | 4                    | 21899           | P07203                 | C                     |
| <b>Biliverdin reductase B</b>                                     | <b>1.9</b>              | <b>2</b>             | <b>22119</b>    | <b>P30043</b>          | <b>C</b>              |
| Rho GDP dissociation inhibitor (GDI) beta                         | 2.6                     | 6                    | 22988           | P52566                 | C                     |
| Protein kinase C and casein kinase substrate in neurons protein 2 | -2.25                   | 9                    | 55704           | Q6FIA3                 | C                     |
| Phosphoglucomutase 1                                              | -2.43                   | 3                    | 61449           | P36871                 | C                     |
| Phosphogluconate dehydrogenase                                    | 2.60                    | 3                    | 53140           | P52209                 | C                     |
| Pyruvate kinase 3                                                 | -8.2                    | 17                   | 57937           | P14618                 | C                     |
| Nicotinamide phosphoribosyltransferase                            | 3.40                    | 4                    | 55487           | A55927                 | C                     |
| Malic enzyme                                                      | 2.12                    | 3                    | 64150           | P48163                 | C                     |
| Calmodulin                                                        | -8.38                   | 6                    | 17163           | P62158                 | C                     |
| Major vault protein                                               | -6.35                   | 7                    | 99326           | Q14764                 | C                     |
| Visfatin                                                          | 2.0                     | 7                    | 55521           | P43490                 | C                     |
| Proteasome assembling chaperone-3                                 | -2.0                    | 3                    | 13096           | A4D216                 | C                     |
| Proteasome 26S ATPase subunit 2                                   | -2.6                    | 4                    | 48634           | A4D0Q1                 | C                     |
| Tumor protein, translationally-controlled 1                       | -8.50                   | 3                    | 15587           | Q8TBK7                 | C                     |



**Table S1. PM differentially expressed proteins (continued)**

| Reference <sup>a</sup>                                   | DIGE Index <sup>b</sup> | Pept. # <sup>c</sup> | MW <sup>d</sup> | SwissProt <sup>e</sup> | Location <sup>f</sup> |
|----------------------------------------------------------|-------------------------|----------------------|-----------------|------------------------|-----------------------|
| Thyroid receptor-interacting protein 14                  | 2.02                    | 9                    | 59189           | Q15646                 | C                     |
| Glycylpeptide N-tetradecanoyltransferase (fragment)      | -3.32                   | 3                    | 7122            | Q9BS83                 | C                     |
| Histidine-tRNA ligase                                    | 2.12                    | 2                    | 57374           | I37559                 | C                     |
| glycyl-tRNA synthetase                                   | 2.0                     | 40                   | 77530           | P41250                 | C                     |
| Type I AF10 protein [Fragment]                           | -4.46                   | 3                    | 8954            | Q71UR7                 | C                     |
| HSP90AA1                                                 | -3.01                   | 3                    | 68329           | Q2VPJ6                 | C                     |
| HSP 84                                                   | -1.9                    | 3                    | 83264           | P08238                 | C                     |
| Ras-GTPase-activating protein SH3-domain-binding protein | -2.0                    | 3                    | 52132           | Q5U0Q1                 | C                     |
| Lamin-B1                                                 | -2.15                   | 44                   | 66367           | BC012295               | N (membrane)          |
| Lamin-B2                                                 | -2.15                   | 8                    | 67647           | BC006551               | N (membrane)          |
| Lamin-A/C                                                | 2.76                    | 7                    | 79397           | P02545                 | N (membrane)          |
| Monocyte protein 5                                       | 2.49                    | 2                    | 72200           | Q9Y3Z3                 | N                     |
| Rhabdomyosarcoma antigen MU-RMS-40.12.                   | 2.0                     | 4                    | 55605           | Q3BDU5                 | N                     |
| Heterogeneous nuclear ribonucleoprotein H                | -2.0                    | 3                    | 49067           | P31943                 | N                     |
| Histone h2a variant                                      | 4.3                     | 2                    | 14714           | Q59FH0                 | N                     |
| splicing factor proline/glutamine rich                   | -3.94                   | 3                    | 76149           | P23246                 | N                     |
| Protein Mago-nashi homolog 2                             | -2.72                   | 6                    | 17265           | Q96A72                 | N                     |
| Major NOS-binding protein                                | -3.81                   | 2                    | 1387            | Q9UDJ7                 | N                     |
| MYF-5                                                    | 1.9                     | 2                    | 28381           | P13349                 | N                     |
| CMP-NeuNAc synthetase                                    | -8.5                    | 4                    | 48379           | Q8NFW8                 | N                     |
| Tubulin alpha 1                                          | 2.74; 2.87;             | 41                   | 50120           | P68363                 | CSK                   |
| Tubulin alpha 3                                          | 2.74                    | 39                   | 50126           | Q71U36                 | CSK                   |
| Tubulin alpha 6                                          | 2.12                    | 41                   | 49791           | Q53GA7                 | CSK                   |
| Tubulin beta                                             | 5.39                    | 2                    | 47736           | Q5JP53                 | CSK                   |
| Actinin alpha 1                                          | -3.95; -2.89            | 2                    | 103057          | P12814                 | CSK                   |
| Actinin alpha 4                                          | -3.29; -4.56            | 6                    | 102268          | O43707                 | CSK                   |
| Desmin                                                   | 2.74                    | 8                    | 53372           | Q8TD99                 | CSK                   |
| Kappa-actin                                              | -2.6                    | 14                   | 41989           | Q9BYX7                 | CSK                   |

**Table S1. PM differentially expressed proteins (continued)**

| Reference <sup>a</sup>                                      | DIGE Index <sup>b</sup> | Pept. # <sup>c</sup> | MW <sup>d</sup> | SwissProt <sup>e</sup> | Location <sup>f</sup> |
|-------------------------------------------------------------|-------------------------|----------------------|-----------------|------------------------|-----------------------|
| EML4 protein                                                | -4.46                   | 3                    | 7492            | Q96HE3                 | CSK                   |
| Katanin p60 subunit A-like protein 2                        | -3.1                    | 2                    | 52775           | Q8IYT4                 | CSK                   |
| Dynein                                                      | -2.43                   | 8                    | 71456           | AB002323               | CSK                   |
| Tau-tubulin kinase                                          | 3.27                    | 2                    | 182353          | Q8IWI7                 | CSK                   |
| Actin related protein 2/3 complex subunit 2                 | 9.60                    | 3                    | 34333           | O15144                 | Ubiquitous            |
| Profilin                                                    | 5.77                    | 5                    | 14852           | P07737                 | Ubiquitous            |
| Annexin I                                                   | 2.08                    | 2                    | 35040           | P04083                 | Ubiquitous            |
| Huntington disease gene regulatory region-binding protein 1 | -2.67                   | 3                    | 41267           | Q9NR83                 | Ubiquitous            |
| Fatty acid binding protein 4, adipocyte                     | 2.26                    | 3                    | 14719           | P15090                 | Ubiquitous            |
| 26S proteasome ATPase subunit                               | -3.1                    | 2                    | 47337           | AAC26843               | Ubiquitous            |
| cAMP-dependent protein kinase catalytic subunit alpha       | -2.8                    | 2                    | 40589           | Q32P54                 | Ubiquitous            |
| leucine rich repeat containing 20                           | -2.25                   | 3                    | 14878           | Q8TCA0                 | Not Classified        |
| TTL/TEL fusion protein TTL-B2                               | -2.13                   | 3                    | 2688            | Q8NEU1                 | Not Classified        |
| CDNA: FLJ21555 fis, clone COL06351                          | -4.46                   | 3                    | 14668           | Q9H716                 | Not Classified        |
| cDNA FLJ76349                                               | 2.02                    | 8                    | 29432           | A8K262                 | Not Classified        |
| Putative uncharacterized protein PRO0628                    | -4.79                   | 3                    | 6383            | Q9UI54                 | Not Classified        |
| IQGAP1 protein                                              | -3.7                    | 21                   | 107472          | Q6PIN4                 | Not Classified        |
| U62317.15 protein                                           | 2.41                    | 5                    | 49924           | U62317                 | Not Classified        |
| NSFL1 (P97) cofactor                                        | 5.25                    | 3                    | 40791           | Q5JXA5                 | Not Classified        |
| Putative uncharacterized protein GPD2                       | 2.25                    | 2                    | 77204           | Q53T76                 | Not Classified        |
| Sequence 1216 from Patent EP1033401                         | 2.74                    | 8                    | 8733            | AX885353               | Not Classified        |
| Sequence 2661 from Patent EP1104808                         | -2.6                    | 10                   | 7636            | AX971858               | Not Classified        |
| Sequence 15632 from Patent EP1074617                        | 2.11                    | 3                    | 72155           | AX880727               | Not Classified        |
| Sequence 3 from Patent WO0068693                            | -3.7; -2.18             | 28                   | 84621           | CAC18967               | Not Classified        |
| Sequence 5 from Patent WO03083117                           | -3.7                    | 4                    | 84593           | AX925926               | Not Classified        |

<sup>a</sup> Protein ID

<sup>b</sup> Protein fold changes in HIV-1 infected monocytes. Negative DIGE Index indicates protein downregulation in infected monocytes. Presence of several values for fold changes indicate multiple modified/degraded protein forms.

<sup>c</sup> Number of unique peptides identified for each protein

<sup>d</sup>Theoretical molecular mass for the primary translation product calculated from DNA sequences protein.

<sup>e</sup> Accession numbers for Swiss-Prot (accessible at <http://ca.expasy.org/sprot/>).

<sup>f</sup> Postulated subcellular localization (accessible at <http://locate.imb.uq.edu.au>) as follows: Plasma membrane integral proteins (PMi) type I (T1) and II (T2), single and multipass; plasma membrane associated (PMa) secreted (S); endoplasmatic reticulum (ER); cytoskeleton (CSK); cytosol (C); mitochondria (M); endosomes (E); lysosomes (L); Golgi (G); ubiquitous (U); unknown (proteins with no postulated localization).

**Table S2. PM Proteins with similar expression**

| Reference <sup>a</sup>                                      | DIGE Index <sup>b</sup> | Pept. # <sup>c</sup> | MW <sup>d</sup> | SwissProt <sup>e</sup> | Location <sup>f</sup> |
|-------------------------------------------------------------|-------------------------|----------------------|-----------------|------------------------|-----------------------|
| Transmembrane protein 77                                    | 1.14                    | 2                    | 15718           | Q6UX65                 | PMi (multipass)       |
| potassium channel tetramerisation domain containing 12      | 1.45                    | 3                    | 35701           | A4D2M4                 | PMi (multipass)       |
| Myelin peripheral protein                                   | -1.23                   | 6                    | 27537           | P25189                 | PMi (singlepass TI)   |
| IgG Fc gamma receptor IIA (CD32)                            | -1.05                   | 2                    | 1085            | P12318                 | PMi (singlepass TI)   |
| Ldl Receptor Ligand-Binding Module 5, Calcium-Coordinating  | -1.29                   | 3                    | 4062            | Q92673                 | PMi (singlepass TI)   |
| ErbB-3 Tyrosine Kinase Receptor                             | 1.07                    | 2                    | 5726            | Q9NNX3                 | PMi (singlepass TI)   |
| Myeloid plasma membrane glycoprotein (CD13)                 | -1.27                   | 3                    | 109540          | P15144                 | PMi (singlepass TII)  |
| CD14 antigen                                                | 1.37                    | 3                    | 40051           | P08571                 | PM                    |
| H <sup>+</sup> -transporting two-sector ATPase              | 1.11                    | 16                   | 56525           | A33370                 | PM                    |
| Amyloid beta A4 precursor protein-binding family B member 1 | -1.43                   | 3                    | 73183           | Q7Z5R6                 | PM                    |
| Immunoglobulin heavy chain variant                          | 1.03                    | 2                    | 44758           | Q9NPP6                 | PM                    |
| rf-an igmLAMBDA fab, chain L                                | 1.03                    | 1                    | 22534           | 1ADQL                  | PM                    |
| Adenylyl cyclase-associated protein 1 (CAP 1)               | 1.03                    | 12                   | 51510           | Q01518                 | PM                    |
| HSP90 protein 1 beta                                        | 1.03                    | 11                   | 83264           | Q29092                 | PM                    |
| Ezrin                                                       | 1.13                    | 6                    | 69398           | P15311                 | PM                    |
| Annexin A2 isoform 2                                        | 1.01; 1.47              | 8                    | 38604           | P07355                 | PM/S                  |
| Epilysin (MMP28)                                            | 1.3                     | 2                    | 1439            | Q96PI0                 | PM/S                  |
| HSP60 isoform                                               | -1.35                   | 3                    | 61587           | Q0VDF9                 | PM/S                  |
| Enolase 1                                                   | -1.06; 1.48             | 2                    | 47169           | P06733                 | PM/S                  |
| Protein disulfide-isomerase precursor                       | 1.11                    | 20                   | 57081           | P07237                 | PM/S                  |
| Neuritin-like protein [Precursor]                           | -1.22;                  | 5                    | 17774           | Q496H8                 | PMa                   |
| TNF receptor-associated factor 2                            | 1.24                    | 4                    | 55859           | Q12933                 | PMa                   |
| Toll-interacting protein                                    | -1.03                   | 4                    | 22798           | Q9H0E2                 | PMa                   |
| Leupaxin                                                    | 1.03                    | 3                    | 43307           | Q6FI07                 | PMa                   |
| Reptin 52                                                   | 1.09                    | 2                    | 50994           | Q9Y230                 | Pma                   |
| Coronin 1A                                                  | -1.27                   | 3                    | 51026           | P31146                 | PMa                   |
| Talin 1                                                     | 1.09;                   | 2                    | 269764          | Q9Y490                 | PMa                   |
| Transforming growth factor alpha precursor                  | -1.34; -1.22            | 3                    | 9303            | Q9UQ91                 | PMa                   |
| Phospholipase C-gamma 1                                     | -2.87; 1.24             | 2                    | 1051            | Q6LC80                 | PMa                   |

**Table S2. PM Proteins with similar expression (cont)**

| Reference <sup>a</sup>                                             | DIGE Index <sup>b</sup> | Pept. # <sup>c</sup> | MW <sup>d</sup> | SwissProt <sup>e</sup> | Location <sup>f</sup> |
|--------------------------------------------------------------------|-------------------------|----------------------|-----------------|------------------------|-----------------------|
| Plastin 2                                                          | -1.33                   | 18                   | 70114           | P13796                 | PMa                   |
| Dystrophin                                                         | 1.07;                   | 2                    | 1299            | Q16427                 | PM/ER                 |
| Glucosidase II                                                     | 1.54                    | 16                   | 106899          | Q14697                 | PM/ER                 |
| Protein disulfide isomerase-associated 4                           | -1.30                   | 2                    | 72932           | P13667                 | PM/ER                 |
| Tumor rejection antigen (Gp96)                                     | -1.46                   | 15                   | 92282           | Q5CAQ5                 | PM/ER                 |
| Membrane-organizing extension spike protein (moesin)               | 1.09                    | 20                   | 67820           | P26038                 | PM/CSK                |
| Zyxin                                                              | 1.13                    | 7                    | 61277           | Q15942                 | PM/CSK                |
| PKA C-alpha                                                        | -1.44                   | 2                    | 3470            | P17612                 | PM/C                  |
| PKA C-beta                                                         | -1.44                   | 2                    | 40623           | P22694                 | PM/C                  |
| Cyclophilin A                                                      | 1.09                    | 10                   | 17881           | P62937                 | PM/C                  |
| Tumor necrosis factor type 1 receptor assoc. protein (HSP75)       | 1.09                    | 2                    | 75342           | Q12931                 | PM/C                  |
| Enolase beta                                                       | 1.04                    | 2                    | 46826           | P13929                 | PM/C                  |
| Enolase gama                                                       | 1.04                    | 2                    | 47108           | P09104                 | PM/C                  |
| Fermitin family homolog 3                                          | -1.33                   | 1                    | 75437           | AK093719               | PM/C                  |
| Ig heavy chain V-III region VH26                                   | 1.07; 1.14              | 2                    | 12582           | P01764                 | S                     |
| Defensin, alpha 3                                                  | -1.29                   | 3                    | 10245           | P59666                 | S                     |
| Glia-activating factor [Precursor]                                 | -1.46                   | 4                    | 23426           | P31371                 | S                     |
| Galactosidase, beta 1 variant                                      | -1.46                   | 2                    | 76021           | Q53G40                 | S                     |
| Gelsolin precursor                                                 | -1.43 -1.3              | 6                    | 85644           | A03011                 | S                     |
| Vimentin                                                           | 1.11                    | 82                   | 53488           | P08670                 | S                     |
| HSP60                                                              | -1.35                   | 11                   | 61054           | P10809                 | S                     |
| GRIP1-associated protein 1                                         | -1.65                   | 5                    | 95258           | Q4V328                 | E                     |
| Ubiquitin-activating enzyme E1                                     | -1.24                   | 8                    | 117848          | P22314                 | E                     |
| Sorting nexin 2 (fragment)                                         | 1.08                    | 7                    | 58409           | Q53GG3                 | E                     |
| Sorting nexin 1 isoform A                                          | 1.08                    | 2                    | 59069           | Q53HL9                 | E                     |
| H <sup>+</sup> -transporting two-sector ATPase                     | 1.11                    | 16                   | 56525           | A33370                 | L                     |
| ATPase, H <sup>+</sup> transporting, lysosomal 70kDa, V1 subunit A | -1.22                   | 18                   | 68260           | Q53YD9                 | L                     |
| VDAC2                                                              | 1.3                     | 3                    | 30412           | P45880                 | M (membrane)          |
| Nadh- Ubiquinone Oxidoreductase Complex I                          | -1.11                   | 4                    | 11171           | O15239                 | M (membrane)          |
| Prohibitin                                                         | -1.37                   | 7                    | 29804           | P35232                 | M (membrane)          |
| Complex I-75kD                                                     | 1.4                     | 10                   | 79417           | BC022368               | M (membrane)          |
| Flavoprotein-ubiquinone oxidoreductase                             | 1                       | 2                    | 68464           | Q16134                 | M (membrane)          |
| Ubiquinol-cytochrome-c reductase                                   | 1.03                    | 8                    | 52585           | A48043                 | M (membrane)          |

**Table S2. PM Proteins with similar expression (cont)**

| Reference <sup>a</sup>                                | DIGE Index <sup>b</sup> | Pept. # <sup>c</sup> | MW <sup>d</sup> | SwissProt <sup>e</sup> | Location <sup>f</sup> |
|-------------------------------------------------------|-------------------------|----------------------|-----------------|------------------------|-----------------------|
| Peroxiredoxin 3 isoform a precursor                   | -1.43                   | 4                    | 27692           | P30048                 | M                     |
| Fumarate hydratase                                    | 1.04                    | 6                    | 54602           | P07954                 | M                     |
| Succinate dehydrogenase complex, flavoprotein variant | 1.11                    | 8                    | 73130           | Q59GW8                 | M                     |
| Flavoprotein subunit of complex II                    | 1.11                    | 8                    | 72645           | P31040                 | M                     |
| Citrate synthase precursor, isoform A                 | -1.27                   | 2                    | 51712           | O75390                 | M                     |
| 3-hydroxyisobutyryl-coenzyme A hydrolase              | 1.01                    | 3                    | 42907           | Q6NVY1                 | M                     |
| Aconitase 2 precursor                                 | 1.40                    | 5                    | 85425           | Q99798                 | M                     |
| ATP synthase, H <sup>+</sup> transporting             | 1.22                    | 2                    | 18491           | Q53FE1                 | M                     |
| Pyruvate kinase 3 isoform 1                           | 1.37                    | 5                    | 57937           | Q15118                 | M                     |
| Malate dehydrogenase, mitochondrial precursor         | 1.8                     | 4                    | 35531           | P40926                 | M                     |
| Cyclophilin B                                         | -1.18                   | 3                    | 22742           | P23284                 | ER                    |
| Glucosidase 2 subunit beta [Precursor]                | -1.44                   | 4                    | 59296           | P14314                 | ER                    |
| Cep192                                                | 1.09                    | 2                    | 189536          | Q8TEP8                 | C                     |
| Phosphoglycerate kinase 1                             | -1.30                   | 2                    | 44614           | P00558                 | C                     |
| Aspartate aminotransferase                            | 1.07                    | 1                    | 46087           | P17174                 | C                     |
| NADPH oxidase activator 2                             | 1.45                    | 4                    | 59695           | P19878                 | C                     |
| Major vault protein                                   | 1.40                    | 7                    | 99326           | Q14764                 | C                     |
| Neutrophil cytosol factor 2                           | 1.45                    | 4                    | 67545           | Q59F14                 | C                     |
| Cell growth-inhibiting gene 33 protein                | 1.14                    | 2                    | 2438            | P18077                 | C                     |
| HSP90AA1                                              | -1.46                   | 3                    | 68329           | Q2VPJ6                 | C                     |
| Lamin-B1                                              | -1.22; 1.08             | 44                   | 66367           | BC012295               | N (membrane)          |
| Scaffold-attachment factor A2                         | -1.35                   | 2                    | 72422           | Q1KMD3                 | N                     |
| Poly(ADP-ribose) polymerase                           | 1.14                    | 4                    | 64175           | P09874                 | N                     |
| C-Rel proto-oncogene protein                          | -1.18                   | 4                    | 12037           | Q04864                 | N                     |
| p53-binding protein Mdm2                              | -1.05                   | 2                    | 995             | Q00987                 | N                     |
| Nucleosome assembly protein 1-like 5                  | -1.23                   | 5                    | 19581           | Q96NT1                 | N                     |
| Tubulin alpha 3                                       | 1.1                     | 39                   | 50126           | Q71U36                 | CSK                   |
| Tubulin alpha 6                                       | 1.2                     | 41                   | 49791           | Q53GA7                 | CSK                   |
| Tubulin alpha 8                                       | 1.3                     | 14                   | 50062           | Q2M3N4                 | CSK                   |
| Actinin alpha 1                                       | 1.07;                   | 2                    | 103057          | P12814                 | CSK                   |
| Actinin alpha 4                                       | 1.07                    | 6                    | 102268          | O43707                 | CSK                   |
| Desmin                                                | 1.2                     | 8                    | 53372           | Q8TD99                 | CSK                   |
| Kappa-actin                                           | -1.12                   | 14                   | 41989           | Q9BYX7                 | CSK                   |

**Table S2. PM Proteins with similar expression (cont)**

| Reference <sup>a</sup>                       | DIGE Index <sup>b</sup> | Pept. # <sup>c</sup> | MW <sup>d</sup> | SwissProt <sup>e</sup> | Location <sup>f</sup> |
|----------------------------------------------|-------------------------|----------------------|-----------------|------------------------|-----------------------|
| F-actin capping protein subunit alpha        | 1.08                    | 5                    | 32923           | P52907                 | CSK                   |
| Dynein                                       | -1.14, 1.16             | 8                    | 71456           | AB002323               | CSK                   |
| Annexin I                                    | 1.01; 1.47              | 2                    | 35040           | P04083                 | Ubiquitous            |
| Annexin A11                                  | 1.03                    | 3                    | 54302           | P50995                 | Ubiquitous            |
| DEAD/H (Asp-Glu-Ala-Asp/His) box polypeptide | -1.25                   | 4                    | 73243           | A2AB15                 | Unknown               |
| Tumor protein D52-like 2                     | 1.07                    | 5                    | 22503           | Q5JWU5                 | Unknown               |
| PNAS-122                                     | 1.75                    | 2                    | 11768           | Q9BZS5                 | Unknown               |
| cDNA FLJ44090 fis, clone TESTI4041903        | -1.23                   | 5                    | 13964           | Q6ZU00                 | Unknown               |
| LOC389906 protein [Fragment]                 | -1.4                    | 4                    | 21228           | Q6PJD4                 | Unknown               |
| Sequence 769 from Patent EP1104808           | -1.33                   | 2                    | 17459           | AX969966               | Unknown               |
| Sequence 1290 from Patent EP1033401          | 1.03                    | 2                    | 9254            | AX885427               | Unknown               |
| Sequence 2892 from Patent EP1104808          | -1.33                   | 2                    | 12413           | AX972089               | Unknown               |

<sup>a</sup> Protein ID

<sup>b</sup> Protein fold changes in HIV-1 infected monocytes. Negative DIGE Index indicates protein downregulation in infected monocytes. Presence of several values for fold changes indicate multiple modified/degraded protein.

<sup>c</sup> Number of unique peptides identified for each protein

<sup>d</sup> Theoretical molecular mass for the primary translation product calculated from DNA sequences protein.

<sup>e</sup> Accession numbers for Swiss-Prot (accessible at <http://ca.expasy.org/sprot/>).

<sup>f</sup> Postulated subcellular localization (accessible at <http://locate.imb.uq.edu.au>) as follows: Plasma membrane integral proteins (PMi) type I (T1) and II (T2), single and multipass; plasma membrane associated (PMa) secreted (S); endoplasmatic reticulum (ER); cytoskeleton (CSK); cytosol (C); mitochondria (M); endosomes (E); lysosomes (L); Golgi (G); ubiquitous (U); unknown (proteins with no postulated localization).
